# Supplementary material for: Transmembrane adaptor protein PAG is a mediator of PD-1 inhibitory signaling in human T cells
Source: PubMed Central journal article supplement (PMC8175585; doi:10.1038/s42003-021-02225-8), 2021-06-03
Supplement: 42003_2021_2225_MOESM1_ESM.pdf [file 42003_2021_2225_MOESM1_ESM.pdf]

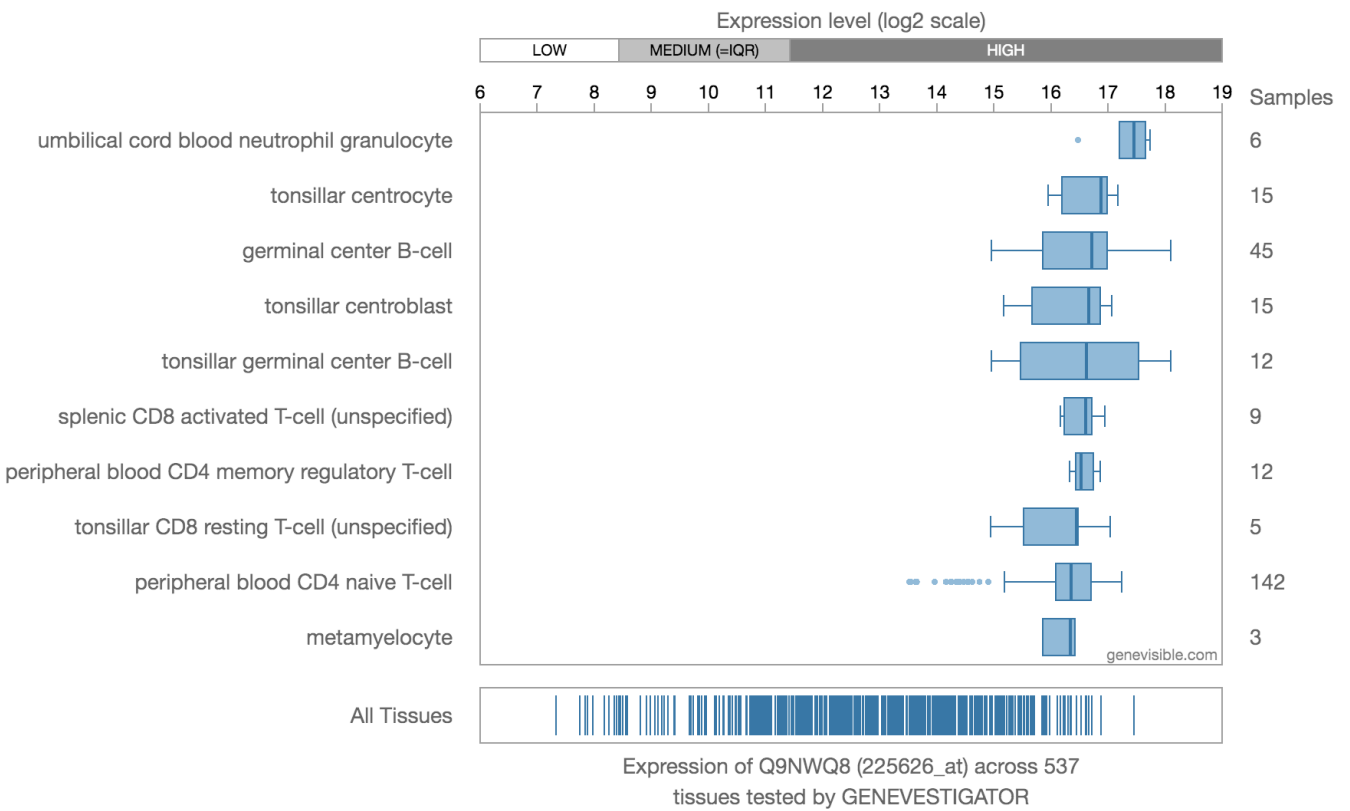

**Supplementary Figure 1.** PAG protein expression in the top 10 highest expressing tissues<sup>14</sup>.

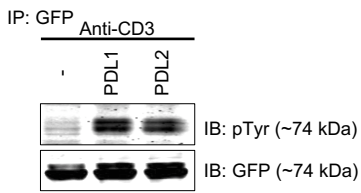

**Supplementary Figure 2.** Jurkat cells expressing PAG-GFP were stimulated with anti-CD3 alone or with PDL1 or PDL2. PAG-GFP was enriched by immunoprecipitation of the lysates and phosphotyrosine was detected by immunoblot. Representative blot of three independent experiments is shown.

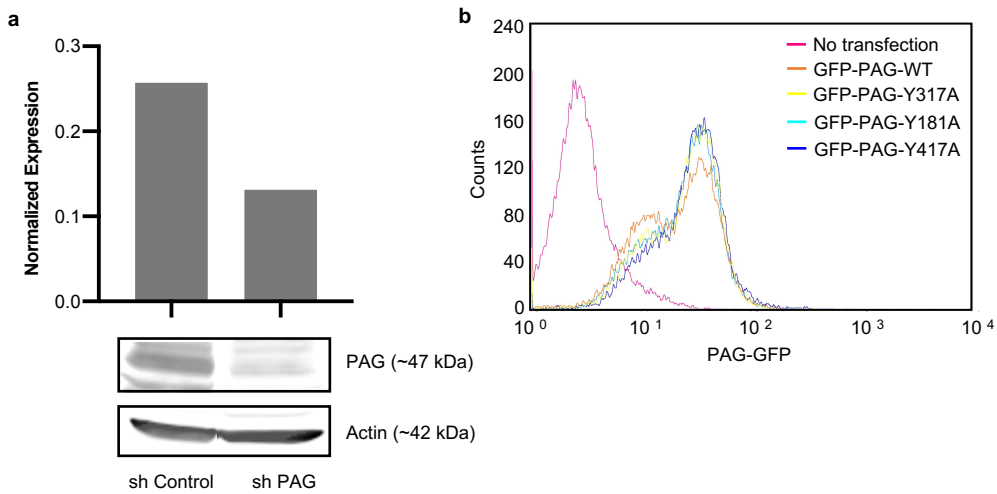

**Supplementary Figure 3. a.** Jurkat cells expressing either a non-targeting shRNA (shControl) or a PAG targeting shRNA (shPAG) were lysed and run on a western blot. Immunoblot shows PAG and actin protein levels. Representative blot is shown. **b.** Jurkat cells expressing sh PAG were transfected with wild type full length PAG or phosphodeficient versions and GFP expression was quantified by flow cytometry.

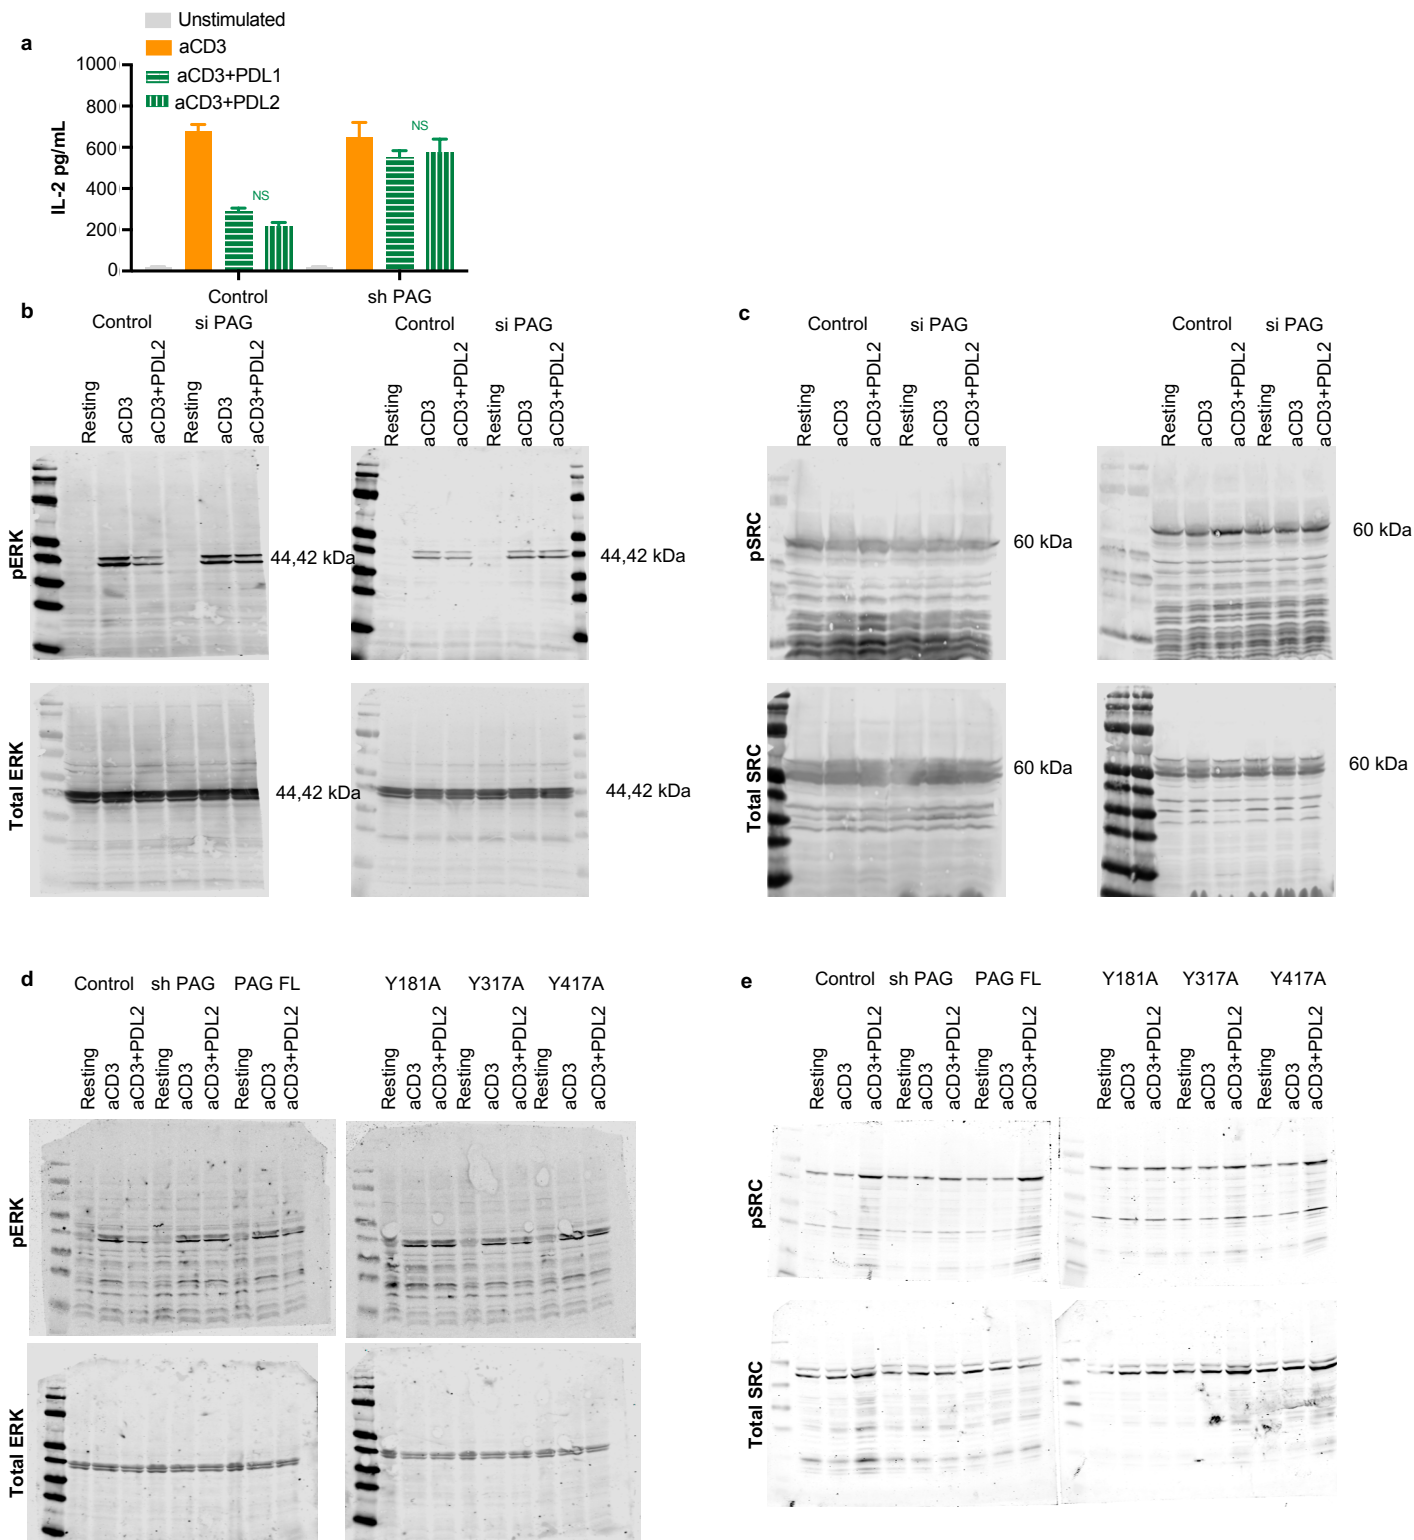

**Supplementary Figure 4.** **a.** ELISA of secreted IL-2. Jurkat cells expressing sh Control or sh PAG were stimulated for 24 hours before supernatants were collected. Bars represent mean  $\pm$  SEM of three independent experiments. **b - e.** Representative western blots of primary T cells (**b, c**) and Jurkat cells (**d, e**) expressing si/sh control or si/sh PAG and rescue transfections with various versions of PAG into shPAG expressing Jurkat cells as indicated. **d.** Table summarizing the contributions of phosphotyrosines 181, 317, and 417 to the assessed T cell functions and PD-1 signaling.

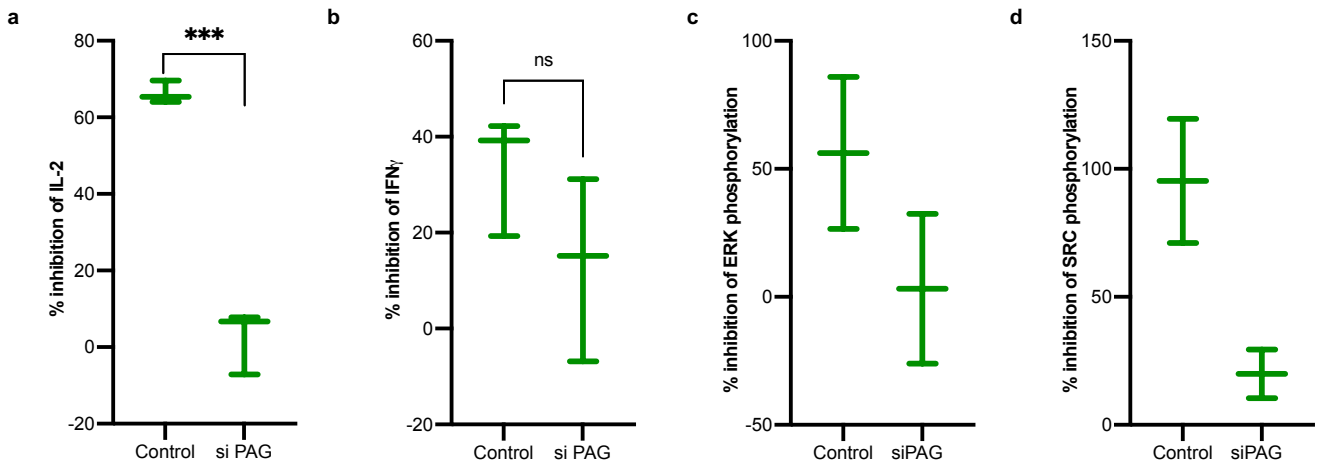

**Supplementary Figure 5. a. and b.** ELISA of secreted IL-2 (a) and IFN $\gamma$  (b) in the supernatants of primary human CD3<sup>+</sup> T cells collected 48 hours following stimulation by magnetic beads. T cells either expressed a non-targeting siRNA (control) or PAG targeting siRNA pool (siPAG). **c and d.** Phosphorylated ERK (c) and phosphorylated SRC (d) were detected by western blot of human CD3<sup>+</sup> T cell lysates 5 minutes after stimulation by magnetic beads. Fold change is calculated relative to anti-CD3 stimulation (c) or unstimulated (d). \*p<0.05; \*\*p<0.01; \*\*\*p<0.001; \*\*\*\*p<0.0001; ns not significant.

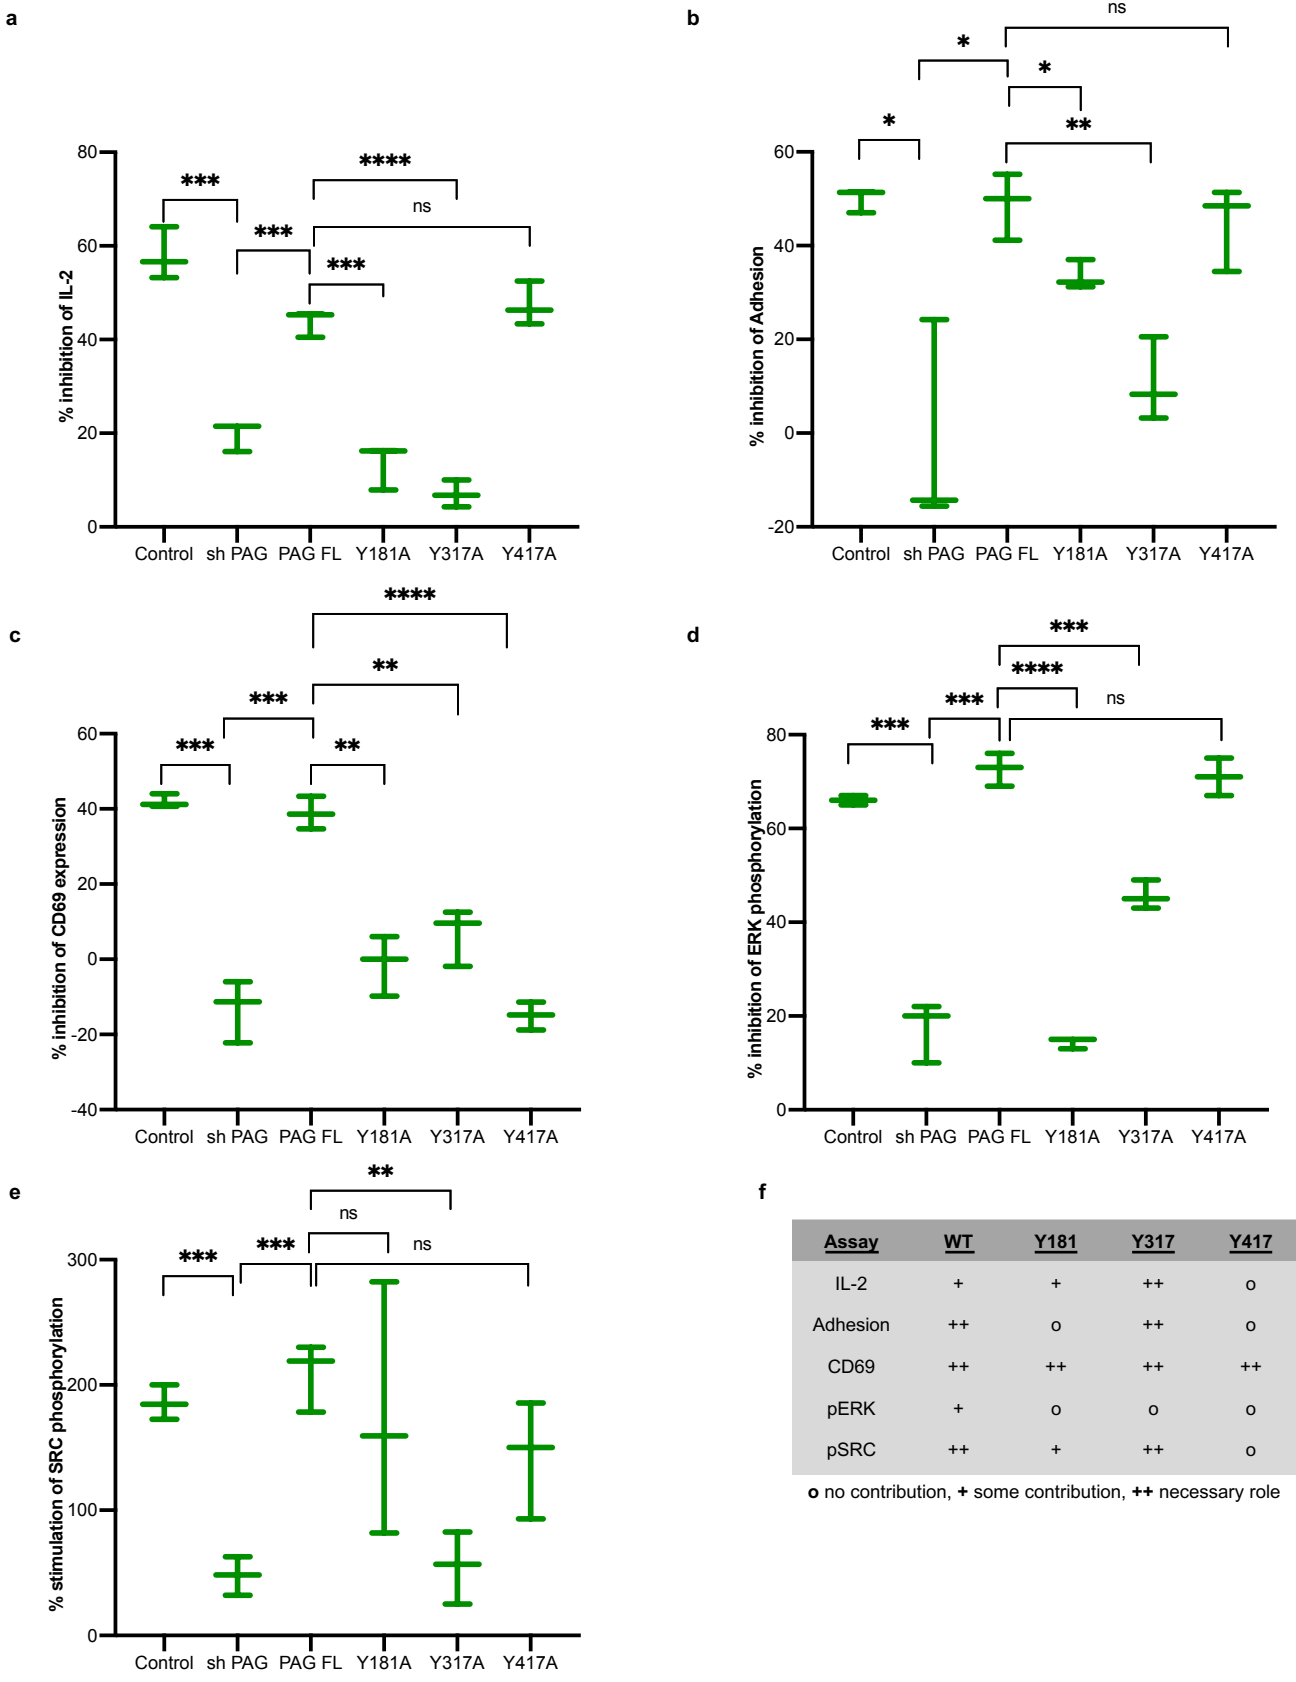

**Supplementary Figure 6.** a. ELISA of secreted IL-2 in the supernatants of Jurkat cells collected 24 hours following stimulation by magnetic beads. Jurkat T cells either expressed a non-targeting shRNA (control) or PAG targeting shRNA (shPAG). For rescue transfections, shPAG Jurkats were transiently transfected with full length, wild type PAG (PAG FL) or with phosphodeficient mutants (Y181A, Y317A, Y417A). b. Adhesion assay of Jurkat cells to fibronectin following stimulation for 15 minutes. The number of adherent cells remaining, expressed as a percentage of the total number of labeled cells, was determined with a fluorescent plate reader. PAG knockdown and rescue transfections as in (A). c. Percentage of Jurkat cells expressing CD69 on the surface following 24 hour stimulation, measured by flow cytometry. PAG knockdown and rescue transfections as in (A). d and e. Phosphorylated ERK (D) and phosphorylated SRC (E) were detected by western blot of Jurkat lysates 5 minutes after stimulation by magnetic beads. PAG knockdown and rescue transfections as in (A). % inhibition is calculated by  $100 - \text{CD3+PDL2} \div \text{CD3} \times 100$ . Bars represent the mean  $\pm$  SEM of three independent experiments. f. Table summarizing the contribution of each phosphotyrosine position to individual T cell functions assayed. \*p<0.05; \*\*p<0.01; \*\*\*p<0.001; \*\*\*\*p<0.0001; ns not significant.

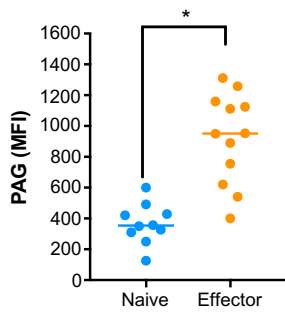

**Supplementary Figure 7.** Human naïve ( $CD8^+CCR7^+CD62L^+$ ) and effector ( $CD8^+CCR7^-CD62L^-$ ) T cells were stained with intracellular anti-PAG antibody and analyzed by flow cytometry. MFI - median fluorescent intensity.

Supplementary Table 1. IL-2 ELISA

| Primary human T cells | Unstimulated |    |    | aCD3 |     |     | aCD3+PDL2 |     |     |
|-----------------------|--------------|----|----|------|-----|-----|-----------|-----|-----|
| Control               | 20           | 25 | 0  | 661  | 640 | 655 | 201       | 230 | 227 |
| si PAG                | 20           | 30 | 32 | 553  | 578 | 610 | 510       | 619 | 569 |

  

| Jurkat cells | Unstimulated |    |    | aCD3     |     |     | aCD3+PDL2 |     |     |
|--------------|--------------|----|----|----------|-----|-----|-----------|-----|-----|
| Control      | 20           | 5  | 23 | 805      | 946 | 902 | 289       | 410 | 422 |
| sh PAG       | 35           | 22 | 32 | 871      | 953 | 944 | 731       | 748 | 741 |
| PAG FL       | 25           | 23 | 23 | 754      | 835 | 810 | 411       | 457 | 482 |
| PAG Y181A    | 19           | 27 | 15 | 750      | 848 | 821 | 691       | 710 | 688 |
| PAG Y317A    | 12           | 14 | 27 | 737.8349 | 790 | 780 | 688       | 756 | 702 |
| PAG Y417A    | 33           | 18 | 29 | 777      | 810 | 838 | 440       | 435 | 398 |



**Supplementary Table 2. IFNg ELISA**

|         | Unstimulated |    |    | aCD3 |      |      | aCD3+PDL2 |      |      |
|---------|--------------|----|----|------|------|------|-----------|------|------|
| Control | 27           | 71 | 46 | 1298 | 1301 | 1514 | 750       | 1050 | 920  |
| si PAG  | 154          | 30 | 36 | 1650 | 1453 | 1404 | 1400      | 1000 | 1500 |

**Supplementary Table 3. Percent inhibition of CD69 expression**

|           | Unstimulated |   |    | aCD3 |    |    | aCD3+PDL2 |    |    |
|-----------|--------------|---|----|------|----|----|-----------|----|----|
| Control   | 3            | 3 | 0  | 51   | 59 | 54 | 30        | 33 | 32 |
| sh PAG    | 3            | 4 | 5  | 54   | 62 | 67 | 66        | 69 | 71 |
| PAG FL    | 7            | 6 | 6  | 49   | 57 | 53 | 32        | 35 | 30 |
| PAG Y181A | 8            | 6 | 2  | 51   | 45 | 50 | 56        | 45 | 47 |
| PAG Y317A | 7            | 6 | 11 | 52   | 56 | 54 | 47        | 49 | 55 |
| PAG Y417A | 6            | 7 | 10 | 27   | 35 | 32 | 31        | 39 | 38 |

**Supplementary Table 4. Percent inhibition of adhesion**

|           | Unstimulated |    |    | aCD3 |    |    | aCD3+PDL2 |    |    |
|-----------|--------------|----|----|------|----|----|-----------|----|----|
| Control   | 10           | 14 | 11 | 35   | 37 | 34 | 17        | 18 | 18 |
| sh PAG    | 14           | 18 | 12 | 28   | 32 | 33 | 32        | 37 | 25 |
| PAG FL    | 8            | 10 | 11 | 30   | 38 | 34 | 15        | 17 | 20 |
| PAG Y181A | 9            | 13 | 7  | 32   | 27 | 31 | 22        | 17 | 21 |
| PAG Y317A | 12           | 16 | 14 | 31   | 36 | 34 | 30        | 33 | 27 |
| PAG Y417A | 8            | 13 | 17 | 37   | 29 | 33 | 18        | 19 | 17 |



Supplementary Table 6. B16F10 Tumor Measurements

| Days | WT       |      |      |      |          |       |        |        |      |      | WT + Anti-PD-1 |        |        |       |       |   |   |   |   |    |
|------|----------|------|------|------|----------|-------|--------|--------|------|------|----------------|--------|--------|-------|-------|---|---|---|---|----|
|      | 1        | 2    | 3    | 4    | 5        | 6     | 7      | 8      | 9    | 10   | 1              | 2      | 3      | 4     | 5     | 6 | 7 | 8 | 9 | 10 |
| 1    | 0        |      |      |      |          |       |        |        |      |      | 0              |        |        |       |       |   |   |   |   |    |
| 2    | 0        |      |      |      |          |       |        |        |      |      | 0              |        |        |       |       |   |   |   |   |    |
| 3    | 0        |      |      |      |          |       |        |        |      |      | 0              |        |        |       |       |   |   |   |   |    |
| 4    | 0        |      |      |      |          |       |        |        |      |      | 0              |        |        |       |       |   |   |   |   |    |
| 5    | 0        |      |      |      |          |       |        |        |      |      | 0              |        |        |       |       |   |   |   |   |    |
| 6    | 0        |      |      |      |          |       |        |        |      |      | 0              |        |        |       |       |   |   |   |   |    |
| 7    | 0        |      |      |      |          |       |        |        |      |      | 0              |        |        |       |       |   |   |   |   |    |
| 8    | 62.5     | 72   | 108  | 75   | 43       |       |        |        |      |      | 42             | 63     | 51     |       |       |   |   |   |   |    |
| 9    | 85       | 100  | 100  | 126  | 97       |       |        |        |      |      | 107            | 126    | 97     |       |       |   |   |   |   |    |
| 10   | 110      | 133  | 110  | 140  | 167      |       |        |        |      |      | 150            | 105    | 128    |       |       |   |   |   |   |    |
| 11   | 133      | 128  | 143  | 270  | 236      |       |        |        |      |      | 203            | 155    | 175    |       |       |   |   |   |   |    |
| 12   | 158.4375 | 155  | 169  | 408  | 386.334  |       |        |        |      |      | 239.0625       | 288    | 340    |       |       |   |   |   |   |    |
| 13   | 251      | 178  | 207  | 455  | 420      | 61.3  | 48.4   | 48.8   |      |      | 328            | 352    | 397    | 67.6  | 58    | 0 |   |   |   |    |
| 14   | 354      | 301  | 360  | 573  | 298      |       |        |        |      |      | 268            | 494    | 445    |       |       |   |   |   |   |    |
| 15   | 465.75   | 710  | 698  | 606  | 564.9188 |       |        |        |      |      | 524            | 627    | 521    |       |       |   |   |   |   |    |
| 16   | 768      | 893  | 1057 | 725  | 615      |       |        |        |      |      | 624            | 757    | 674    |       |       |   |   |   |   |    |
| 17   | 1102     | 1205 | 1108 | 947  | 799      | 171.5 | 162    | 486    |      |      | 795            | 827    | 973    | 288   | 196   | 0 |   |   |   |    |
| 18   | 1547     | 1403 | 1650 | 1350 | 1220     |       |        |        |      |      | 1187           | 1080   | 1280   |       |       |   |   |   |   |    |
| 19   | 1688     | 1620 | 2017 | 1505 | 1521     | 744.2 | 635    | 726    |      |      | 1071           | 1231   | 1533   | 299.2 | 282.8 | 0 |   |   |   |    |
| 20   | 1801     | 2017 | 2219 | 2403 | 2101     |       |        |        |      |      | 1371           | 1775   | 1895   |       |       |   |   |   |   |    |
| 21   | 3105     | 2258 | 2730 | 2437 | 2450     | 1890  | 1793.4 | 2073.6 | 1852 | 2280 | 2364           | 1428.8 | 2229.2 | 0     |       |   |   |   |   |    |

| Days | PAG KO   |          |         |          |          |       |       |        |     |      | PAG KO + Anti-PD-1 |        |        |        |       |      |   |   |   |    |
|------|----------|----------|---------|----------|----------|-------|-------|--------|-----|------|--------------------|--------|--------|--------|-------|------|---|---|---|----|
|      | 1        | 2        | 3       | 4        | 5        | 6     | 7     | 8      | 9   | 10   | 1                  | 2      | 3      | 4      | 5     | 6    | 7 | 8 | 9 | 10 |
| 1    | 0        |          |         |          |          |       |       |        |     |      | 0                  |        |        |        |       |      |   |   |   |    |
| 2    | 0        |          |         |          |          |       |       |        |     |      | 0                  |        |        |        |       |      |   |   |   |    |
| 3    | 0        |          |         |          |          |       |       |        |     |      | 0                  |        |        |        |       |      |   |   |   |    |
| 4    | 0        |          |         |          |          |       |       |        |     |      | 0                  |        |        |        |       |      |   |   |   |    |
| 5    | 0        |          |         |          |          |       |       |        |     |      | 0                  |        |        |        |       |      |   |   |   |    |
| 6    | 0        |          |         |          |          |       |       |        |     |      | 0                  |        |        |        |       |      |   |   |   |    |
| 7    | 0        |          |         |          |          |       |       |        |     |      | 0                  |        |        |        |       |      |   |   |   |    |
| 8    | 154.791  | 125      | 117     | 108      | 75       |       |       |        |     |      | 41                 | 37     | 66     |        |       |      |   |   |   |    |
| 9    | 180      | 140      | 170     | 127      | 64       |       |       |        |     |      | 55                 | 58     | 73     |        |       |      |   |   |   |    |
| 10   | 163      | 145      | 199     | 150      | 76       |       |       |        |     |      | 73                 | 112    | 101    |        |       |      |   |   |   |    |
| 11   | 170      | 145      | 213     | 178      | 99       |       |       |        |     |      | 90                 | 179    | 144    |        |       |      |   |   |   |    |
| 12   | 179.5625 | 91       | 218     | 253.6285 | 110.808  |       |       |        |     |      | 141                | 250    | 204    |        |       |      |   |   |   |    |
| 13   | 202      | 155      | 287     | 288      | 186      | 15.4  | 76.3  | 35.3   |     |      | 172                | 246.63 | 119.88 | 30.4   | 27.2  | 19.2 |   |   |   |    |
| 14   | 240      | 206      | 310     | 310      | 265      |       |       |        |     |      | 223                | 212.84 | 193.98 |        |       |      |   |   |   |    |
| 15   | 285      | 179.5625 | 378.895 | 324      | 313.8266 |       |       |        |     |      | 270                | 249.77 | 250    |        |       |      |   |   |   |    |
| 16   | 351      | 363      | 420     | 441      | 501      |       |       |        |     |      | 274                | 266    | 289    |        |       |      |   |   |   |    |
| 17   | 527      | 450      | 558     | 600      | 681      | 64    | 484.3 | 766.1  |     |      | 180                | 301    | 321    | 395.1  | 423.2 | 115  |   |   |   |    |
| 18   | 596      | 636      | 753     | 633      | 789      |       |       |        |     |      | 455                | 447    | 305    |        |       |      |   |   |   |    |
| 19   | 750      | 842      | 831     | 1048     | 1190     | 136.1 | 465.8 | 1023.4 |     |      | 603                | 460    | 337    | 885.8  | 617.2 | 180  |   |   |   |    |
| 20   | 1090     | 1210     | 1258    | 1330     | 1644     |       |       |        |     |      | 762                | 952    | 631    |        |       |      |   |   |   |    |
| 21   | 1860     | 1407     | 1548    | 1472     | 1950     | 727.4 | 738.1 | 1502.2 | 950 | 1308 | 903                | 1381.8 | 1264.8 | 1140.8 |       |      |   |   |   |    |
